# Supplementary material
Source: HighWire-hosted journal article supplement (https://gut.bmj.com/content/70/10/1857)

## Sup-Fig. 4

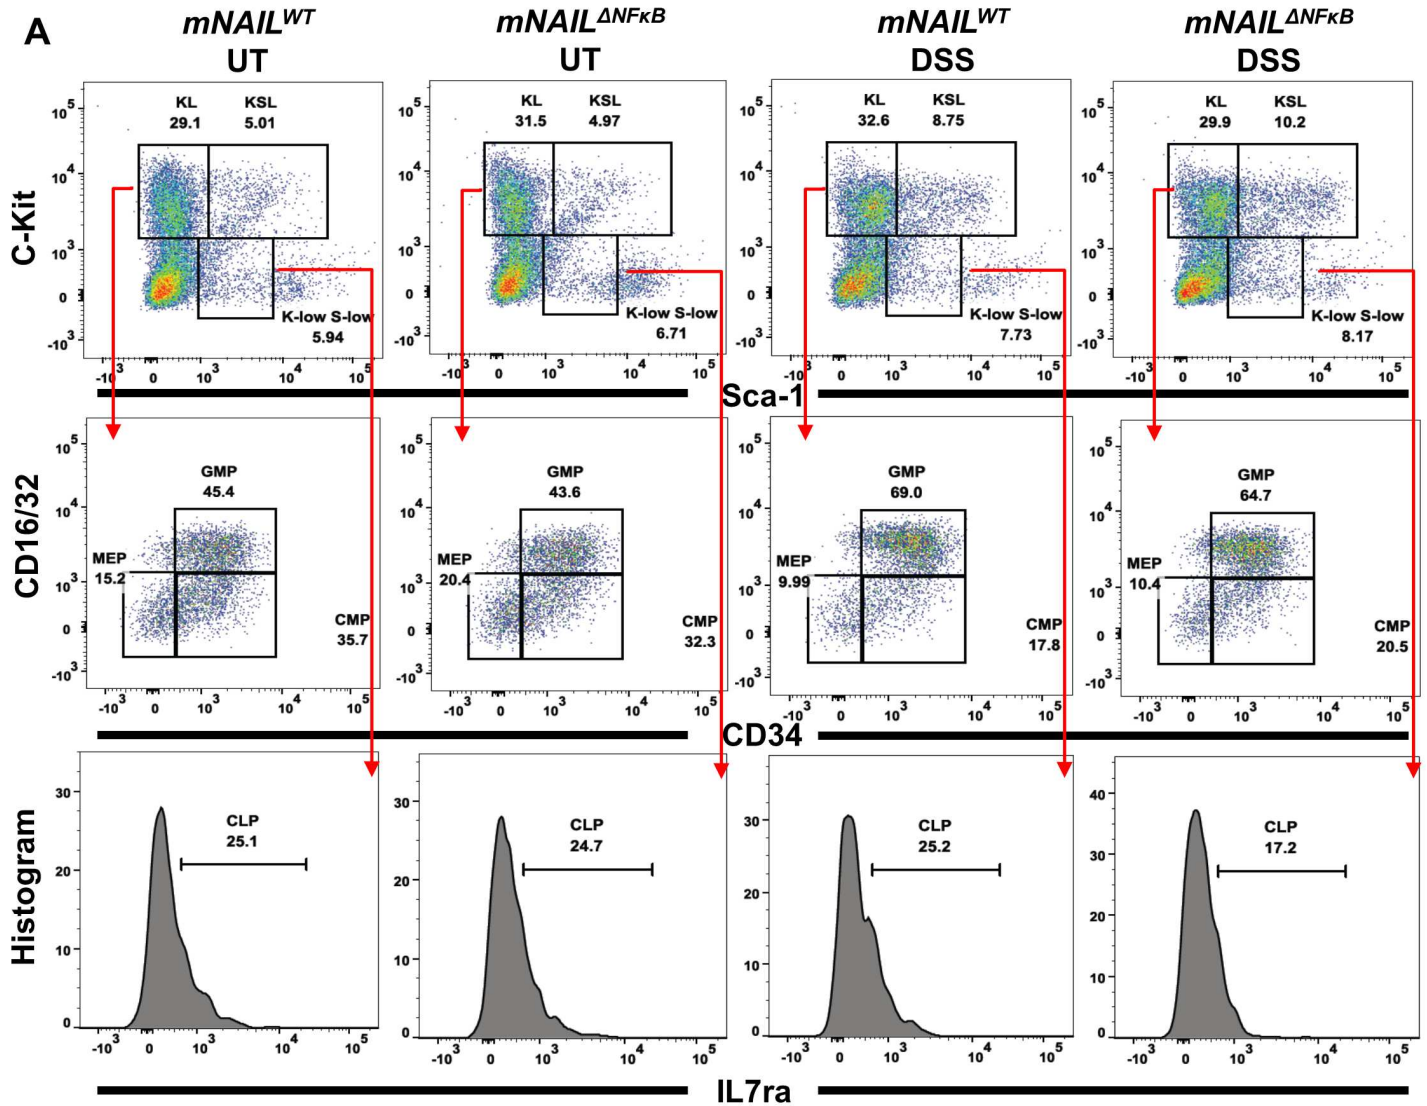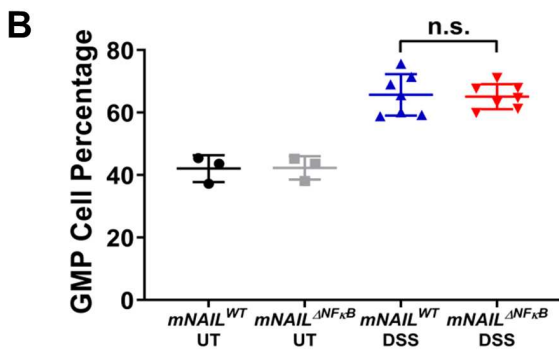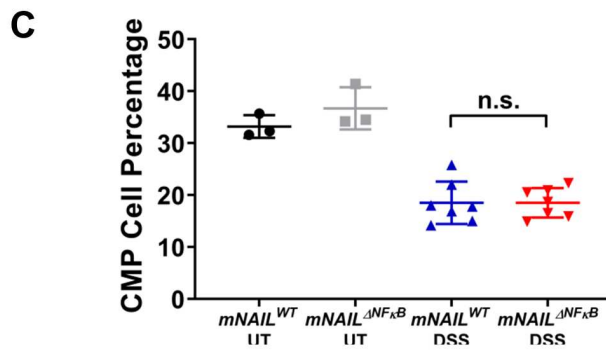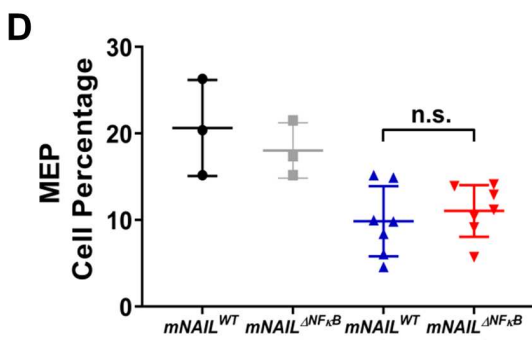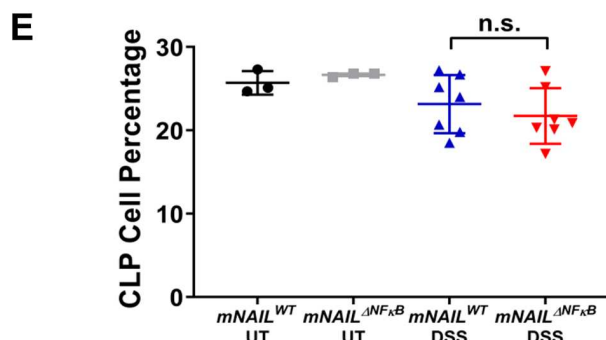

Supplement: inline-supplementary-material-5 [file inline-supplementary-material-5.pdf]

## Sup-Fig. 6

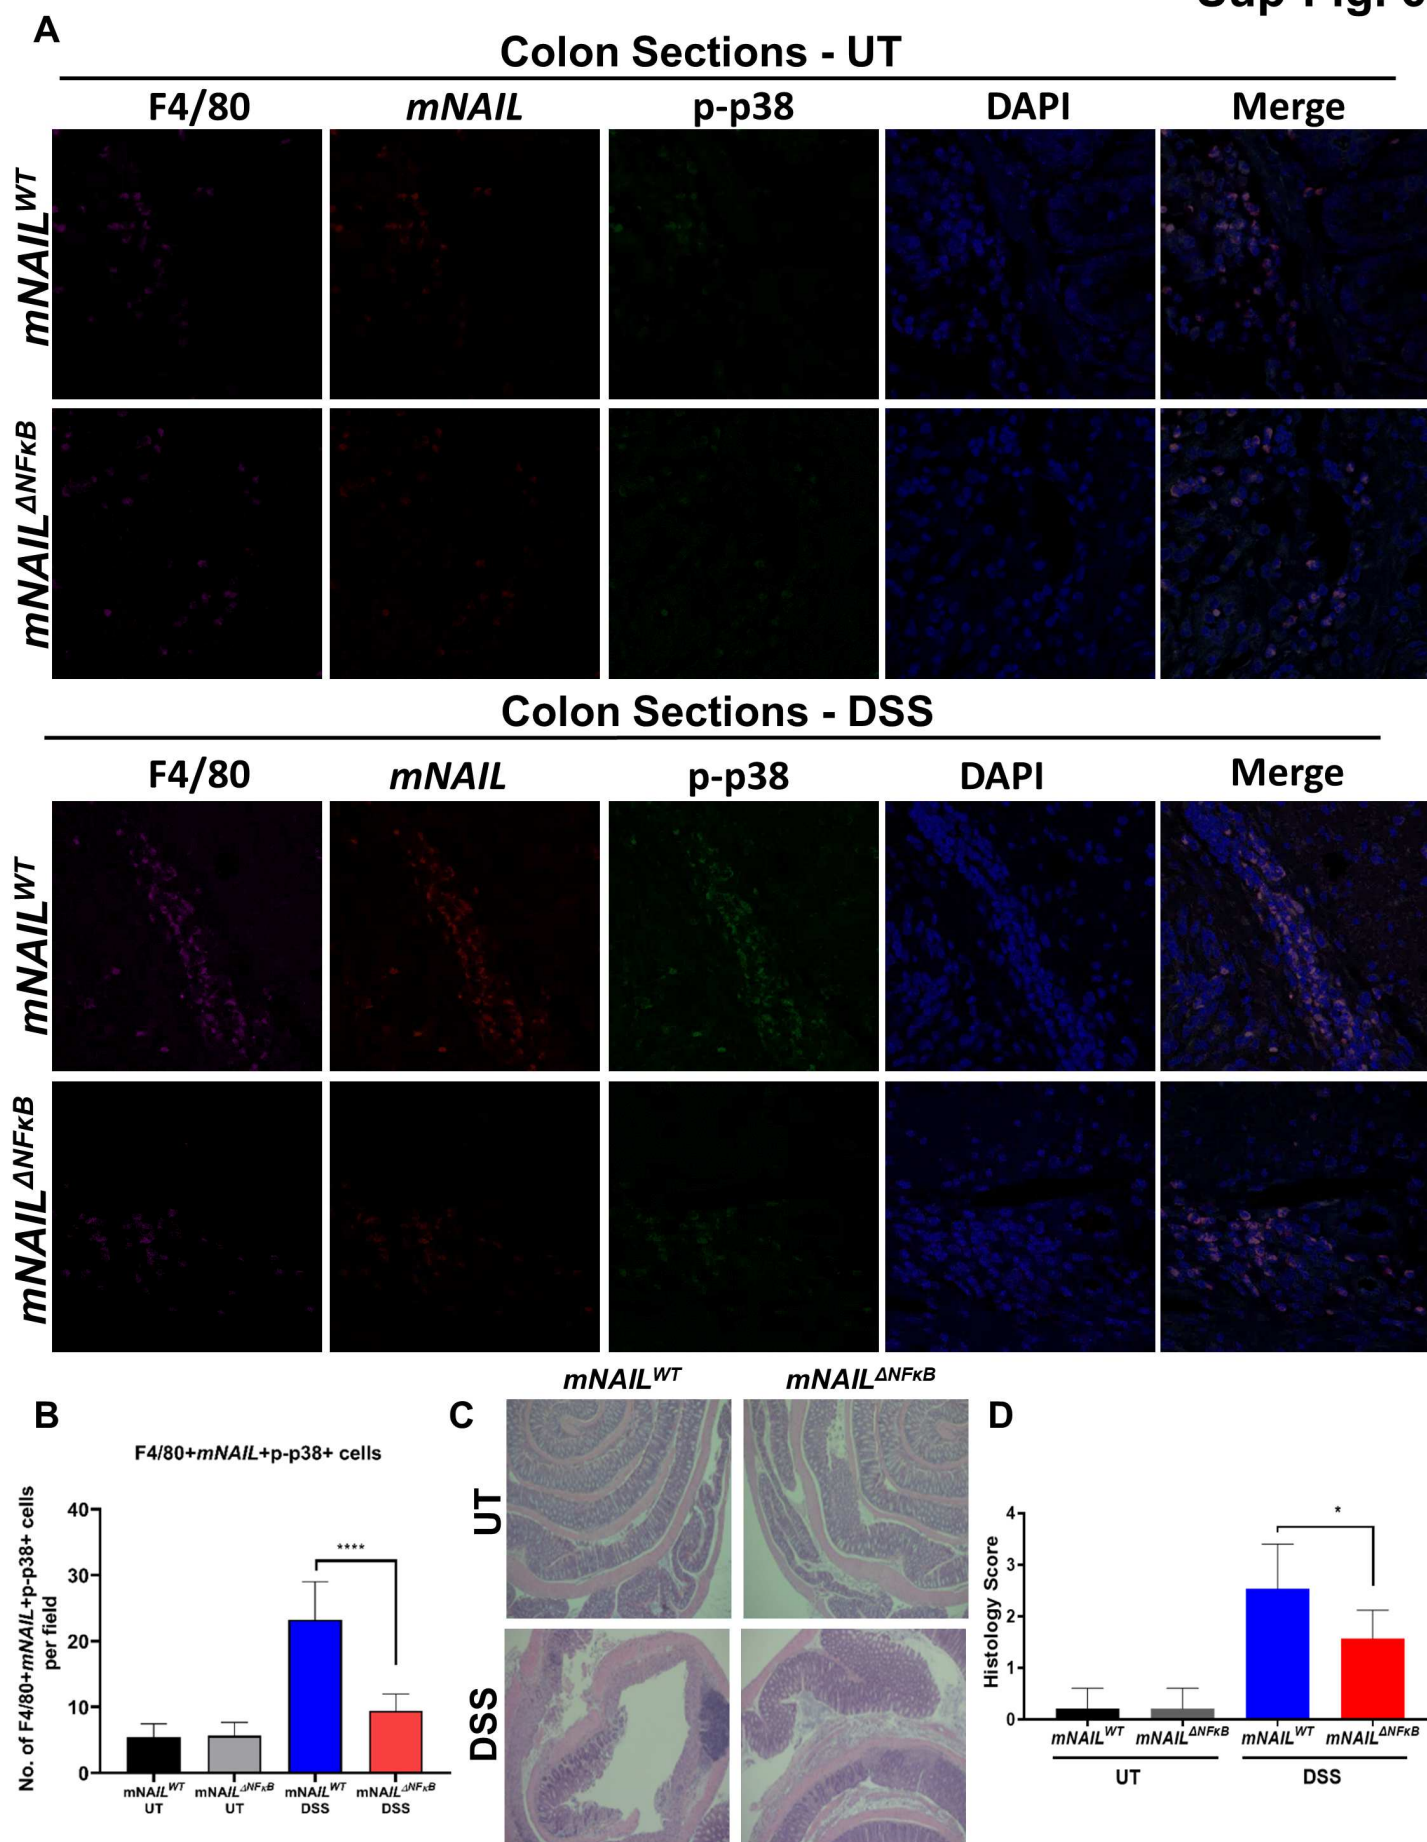

Supplement: inline-supplementary-material-7 [file inline-supplementary-material-7.pdf]
